# Supplementary material for: Is Segmental Ureterectomy Associated with Inferior Survival for Localized Upper-Tract Urothelial Carcinoma of the Ureter Compared to Radical Nephroureterectomy?
Source: MDPI journal article supplement (doi:10.3390/cancers15051373), 2023-02-21
Supplement: s1 [file s1]

**Table S1.** Comparison of the baseline characteristics of patients affected by urothelial carcinoma of the ureter who were included in the study vs those who were excluded.

| Characteristic           |              | Excluded patients<br>N = 11,049 (45.8%) | Included patients<br>N = 13,061 (54.2%) | p-value |
|--------------------------|--------------|-----------------------------------------|-----------------------------------------|---------|
| Age categories, years    | < 60         | 1146 (10.4)                             | 1559 (11.9)                             | >0.001  |
|                          | 60–69        | 2497 (22.6)                             | 3441 (26.4)                             |         |
|                          | 70–79        | 3749 (33.9)                             | 4852 (37.2)                             |         |
|                          | > 80         | 3657 (33.1)                             | 3209 (24.6)                             |         |
| Gender, N (%)            | Male         | 6661 (60.3)                             | 8239 (63.1)                             | >0.001  |
|                          | Female       | 4388 (39.7)                             | 4822 (36.9)                             |         |
| Race, N (%)              | White        | 10,179 (92.1)                           | 12,104 (92.7)                           | 0.125   |
|                          | Black        | 427 (3.9)                               | 443 (3.4)                               |         |
|                          | Other        | 349 (3.2)                               | 399 (3.1)                               |         |
|                          | Unknown      | 94 (0.9)                                | 115 (0.9)                               |         |
| Comorbidity index, N (%) | 0            | 7433 (67.3)                             | 8377 (64.1)                             | >0.001  |
|                          | 1            | 2502 (22.6)                             | 3281 (25.1)                             |         |
|                          | 2            | 804 (7.3)                               | 1028 (7.9)                              |         |
|                          | ≥3           | 310 (2.8)                               | 375 (2.9)                               |         |
| Insurance status, N (%)  | Private      | 2392 (21.7)                             | 3218 (24.6)                             | >0.001  |
|                          | Medicaid     | 360 (3.3)                               | 364 (2.8)                               |         |
|                          | Medicare     | 7895 (71.5)                             | 9170 (70.2)                             |         |
|                          | Uninsured    | 137 (1.2)                               | 146 (1.1)                               |         |
|                          | Unknown      | 265 (2.4)                               | 163 (1.3)                               |         |
| Income, N (%)            | High         | 6817 (61.7)                             | 8054 (61.7)                             | 0.223   |
|                          | Low          | 4186 (37.9)                             | 4932 (37.8)                             |         |
|                          | Unknown      | 46 (0.4)                                | 75 (0.6)                                |         |
| Education, N (%)         | High         | 6651 (60.2)                             | 8103 (62.0)                             | 0.002   |
|                          | Low          | 4358 (39.4)                             | 4891 (37.5)                             |         |
|                          | Unknown      | 40 (0.4)                                | 67 (0.5)                                |         |
| Facility type, N (%)     | Academic     | 3959 (35.8)                             | 4563 (34.9)                             | 0.064   |
|                          | Non-academic | 7050 (63.8)                             | 8467 (64.8)                             |         |
|                          | Unknown      | 40 (0.4)                                | 31 (0.2)                                |         |
| Facility location, N (%) | East         | 4839 (44.3)                             | 5766 (44.2)                             | >0.001  |
|                          | Central      | 4383 (39.7)                             | 5546 (42.5)                             |         |
|                          | West         | 1733 (15.7)                             | 1718 (13.2)                             |         |
|                          | Unknown      | 40 (0.4)                                | 31 (0.2)                                |         |
| Facility county (%)      | Metro        | 8928 (80.8)                             | 10,531 (80.6)                           | 0.805   |
|                          | Urban        | 1626 (14.7)                             | 1928 (14.8)                             |         |
|                          | Rural        | 197 (1.8)                               | 255 (2.0)                               |         |
|                          | Unknown      | 298 (2.7)                               | 347 (2.7)                               |         |
| Facility distance (%)    | First        | 6318 (57.2)                             | 7158 (54.8)                             | >0.001  |
|                          | Second       | 3228 (29.2)                             | 4194 (32.1)                             |         |
|                          | Third        | 1470 (13.3)                             | 1653 (12.7)                             |         |
|                          | Unknown      | 33 (0.3)                                | 56 (0.4)                                |         |
| Clinical T stage (%)     | ≤T1          | 4648 (42.1)                             | 5158 (39.5)                             | >0.001  |
|                          | T2           | 629 (5.7)                               | 1079 (8.3)                              |         |
|                          | T3           | 656 (5.9)                               | 827 (6.3)                               |         |
|                          | T4           | 422 (3.8)                               | 92 (0.7)                                |         |
|                          | Unknown      | 4694 (42.5)                             | 5905 (45.2)                             |         |

|                             |              |               |               |        |
|-----------------------------|--------------|---------------|---------------|--------|
| Tumor size (%)              | <= 2 cm      | 2064 (18.7)   | 3675 (28.1)   | >0.001 |
|                             | > 2 cm       | 3155 (28.6)   | 6505 (49.8)   |        |
|                             | Unknown      | 5830 (52.8)   | 2881 (22.1)   |        |
| Tumor grade (%)             | Low grade    | 2,040 (18.5)  | 1975 (15.1)   | >0.001 |
|                             | High grade   | 3,178 (28.8)  | 4392 (33.6)   |        |
|                             | Unknown      | 5831 (52.8)   | 6694 (51.3)   |        |
| Lymph vascular invasion (%) | Not present  | 2867 (26.0)   | 4488 (34.4)   | >0.001 |
|                             | Present      | 548 (5.0)     | 954 (7.3)     |        |
|                             | Unknown      | 7634 (69.1)   | 7619 (58.3)   |        |
| Chemotherapy (%)            | Not received | 10,504 (78.5) | 10,997 (84.2) | >0.001 |
|                             | Received     | 1956 (17.7)   | 1568 (12.0)   |        |
|                             | Unknown      | 422 (3.8)     | 496 (3.8)     |        |

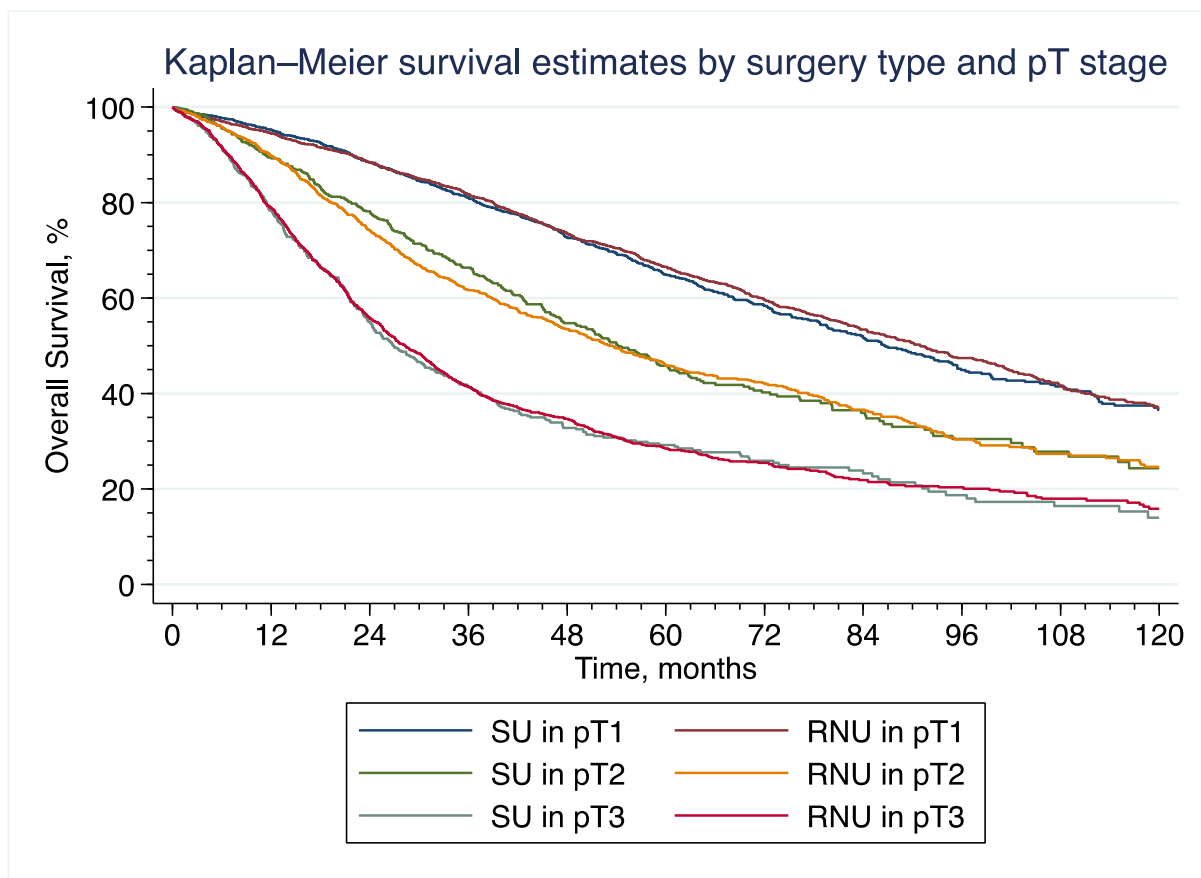

**FigureS1.** Overlap weighting-adjusted Kaplan-Meier analysis of overall survival in patients who received Radical Nephroureterectomy vs Segmental Ureterectomy, according to pathological T stage. SU= Segmental Ureterectomy, RNU= Radical Nephroureterectomy, pT stage= pathological T stage.
